# Supplementary material for: The helicase Pif1 functions in the template switching pathway of DNA damage bypass
Source: PubMed Central journal article supplement — Nucleic Acids Res. 2018 Aug 10;46(16):8347–56. doi: 10.1093/nar/gky648 (PMC6144865; doi:10.1093/nar/gky648), 2018-08-10

## **SUPPLEMENTARY DATA**

### **The helicase Pif1 functions in the template switching pathway of DNA damage bypass**

Néstor García-Rodríguez, Ronald P. Wong and Helle D. Ulrich

|                                    |            |
|------------------------------------|------------|
| Supplementary Table 1              | page 2     |
| Supplementary References           | page 4     |
| Supplementary Figure legends S1-S6 | pages 5-6  |
| Supplementary Figures S1-S6        | pages 7-12 |

**Supplementary Table 1: Yeast strains used in this study**

| <b>Strain</b>                                    | <b>Genotype</b>                                                                                          | <b>Source</b> |
|--------------------------------------------------|----------------------------------------------------------------------------------------------------------|---------------|
| WT (DF5)                                         | <i>Mat a, his3-Δ200, leu2-3,112, lys2-801, trp1-1, ura3-52</i>                                           | (1)           |
| <i>exo1Δ</i>                                     | DF5, <i>exo1Δ::natNT2</i>                                                                                | This study    |
| <i>pif1Δ</i>                                     | DF5, <i>pif1Δ::hphNT1</i>                                                                                | This study    |
| <i>exo1Δ pif1Δ</i>                               | DF5, <i>exo1Δ::natNT2, pif1Δ::hphNT1</i>                                                                 | This study    |
| <i>rev3Δ</i>                                     | DF5, <i>rev3Δ::hisG-URA3-hisG</i>                                                                        | This study    |
| <i>ubc13Δ</i>                                    | DF5, <i>ubc13Δ::HIS3MX</i>                                                                               | (2)           |
| <i>exo1Δ rev3Δ</i>                               | DF5, <i>exo1Δ::natNT2, rev3Δ::hisG-URA3-hisG</i>                                                         | This study    |
| <i>pif1Δ rev3Δ</i>                               | DF5, <i>pif1Δ::hphNT1, rev3Δ::hisG-URA3-hisG</i>                                                         | This study    |
| <i>exo1Δ pif1Δ rev3Δ</i>                         | DF5, <i>exo1Δ::natNT2, pif1Δ::hphNT1, rev3Δ::hisG-URA3-hisG</i>                                          | This study    |
| <i>exo1Δ ubc13Δ</i>                              | DF5, <i>exo1Δ::natNT2, ubc13Δ::HIS3MX</i>                                                                | This study    |
| <i>pif1Δ ubc13Δ</i>                              | DF5, <i>pif1Δ::hphNT1, ubc13Δ::HIS3MX</i>                                                                | This study    |
| <i>exo1Δ pif1Δ ubc13Δ</i>                        | DF5, <i>exo1Δ::natNT2, pif1Δ::hphNT1, ubc13Δ::HIS3MX</i>                                                 | This study    |
| <i>pif1-m2</i>                                   | DF5, <i>pif1-m2::TRP1</i>                                                                                | This study    |
| <i>exo1Δ pif1-m2</i>                             | DF5, <i>exo1Δ::hphNT1, pif1-m2::TRP1</i>                                                                 | This study    |
| <i>pif1-R3E</i>                                  | DF5, <i>pif1-R3E::TRP1</i>                                                                               | This study    |
| <i>rrm3Δ</i>                                     | DF5, <i>rrm3Δ::natNT2</i>                                                                                | This study    |
| <i>PIF1<sup>9myc</sup></i>                       | DF5, <i>KanMX::TetO<sub>7</sub>-RAD18, LEU2::TetR'-SSN6, TRP1::BrdU-inc, PIF1<sup>9myc</sup>::hphNT1</i> | This study    |
| <i>PIF1<sup>GFP</sup></i>                        | DF5, <i>PIF1<sup>GFP</sup>::natNT2</i>                                                                   | This study    |
| <i>pif1-R3E<sup>GFP</sup></i>                    | DF5, <i>pif1-R3E<sup>GFP</sup>::natNT2</i>                                                               | This study    |
| <i>PIF1<sup>GFP</sup> RAD52<sup>mRuby2</sup></i> | DF5, <i>PIF1<sup>GFP</sup>::natNT2, RAD52<sup>mRuby2</sup>::HIS3MX6</i>                                  | This study    |
| <i>pol32Δ</i>                                    | DF5, <i>pol32Δ::KanMX</i>                                                                                | (3)           |
| <i>pol32Δ exo1Δ</i>                              | DF5, <i>pol32Δ::KanMX, exo1Δ::natNT2</i>                                                                 | This study    |
| <i>pol32Δ pif1Δ</i>                              | DF5, <i>pol32Δ::KanMX, pif1Δ::natNT2</i>                                                                 | This study    |
| <i>pol32Δ exo1Δ pif1Δ</i>                        | DF5, <i>pol32Δ::KanMX, exo1Δ::natNT2 pif1Δ::hphNT1</i>                                                   | This study    |
| <i>pol32Δ ubc13Δ</i>                             | DF5, <i>pol32Δ::KanMX, ubc13Δ::natNT2</i>                                                                | This study    |
| <i>pol32Δ pif1-m2</i>                            | DF5, <i>pol32Δ::KanMX, pif1-m2::TRP1</i>                                                                 | This study    |

|                                     |                                                                                                              |              |
|-------------------------------------|--------------------------------------------------------------------------------------------------------------|--------------|
| <i>pol32Δ exo1Δ pif1-m2</i>         | DF5, <i>pol32Δ::KanMX, exo1Δ::hphNT1, pif1-m2::TRP1</i>                                                      | This study   |
| <i>pol32Δ pif1-R3E</i>              | DF5, <i>pol32Δ::KanMX, pif1-R3E::TRP1</i>                                                                    | This study   |
| <i>pol32Δ rrm3Δ</i>                 | DF5, <i>pol32Δ::KanMX, rrm3Δ::natNT2</i>                                                                     | This study   |
| <i>sgs1Δ</i>                        | DF5 <i>KanMX::TetO7-RAD18, LEU2::TetR'-SSN6, TRP1::BrdU-inc, sgs1Δ::hphNT1</i>                               | (4)          |
| <i>sgs1Δ exo1Δ</i>                  | DF5 <i>KanMX::TetO7-RAD18, LEU2::TetR'-SSN6, TRP1::BrdU-inc, sgs1Δ::hphNT1, exo1Δ::natNT2</i>                | This study   |
| <i>sgs1Δ pif1Δ</i>                  | DF5 <i>KanMX::TetO7-RAD18, LEU2::TetR'-SSN6, TRP1::BrdU-inc, sgs1Δ::hphNT1, pif1Δ::natNT2</i>                | This study   |
| <i>sgs1Δ exo1Δ pif1Δ</i>            | DF5 <i>KanMX::TetO7-RAD18, LEU2::TetR'-SSN6, TRP1::BrdU-inc, sgs1Δ::hphNT1, exo1Δ::HIS3MX, pif1Δ::natNT2</i> | This study   |
| <i>HisPOL30</i>                     | DF5, <i>pol30Δ::URA3, YIp128-P30-His6-POL30::LEU2</i>                                                        | (5)          |
| <i>HisPOL30 exo1Δ</i>               | DF5, <i>pol30Δ::URA3, YIp128-P30-His6-POL30::LEU2, exo1Δ::hphNT1</i>                                         | This study   |
| <i>HisPOL30 pif1Δ</i>               | DF5, <i>pol30Δ::URA3, YIp128-P30-His6-POL30::LEU2, pif1Δ::hphNT1</i>                                         | This study   |
| <i>HisPOL30 exo1Δ pif1Δ</i>         | DF5, <i>pol30Δ::URA3, YIp128-P30-His6-POL30::LEU2, exo1Δ::hphNT1, pif1Δ::natNT2</i>                          | This study   |
| WT (W303)                           | <i>Mat a, leu2-3,112, trp1-1, can1-100, ura3-1, ade2-1, his3-11,15, RAD5+</i>                                | R. Rothstein |
| W303 <i>exo1Δ</i>                   | W303, <i>exo1Δ::hphNT1</i>                                                                                   | This study   |
| W303 <i>pif1Δ</i>                   | W303, <i>pif1Δ::hphNT1</i>                                                                                   | This study   |
| W303 <i>exo1Δ pif1Δ</i>             | W303, <i>pif1Δ::hphNT1, exo1Δ::natNT2</i>                                                                    | This study   |
| W303 <i>ubc13Δ</i>                  | W303, <i>ubc13Δ::natNT2</i>                                                                                  | This study   |
| W303 <i>pif1-m1</i>                 | W303, <i>pif1-m1::TRP1</i>                                                                                   | This study   |
| W303 <i>pif1-m2</i>                 | W303, <i>pif1-m2::TRP1</i>                                                                                   | This study   |
| W303 <i>pif1-R3E</i>                | W303, <i>pif1-R3E::TRP1</i>                                                                                  | This study   |
| W303 <i>pif1-R3E<sup>9myc</sup></i> | W303, <i>pif1-R3E<sup>9myc</sup>::hphNT1</i>                                                                 | This study   |
| <i>smc6-56</i>                      | W303, <i>smc6-56<sup>13myc</sup>::KanMX</i>                                                                  | (6)          |
| <i>smc6-56 exo1Δ</i>                | W303, <i>smc6-56<sup>13myc</sup>::KanMX, exo1Δ::hphNT1</i>                                                   | This study   |
| <i>smc6-56 pif1Δ</i>                | W303, <i>smc6-56<sup>13myc</sup>::KanMX, pif1Δ::natNT2</i>                                                   | This study   |
| <i>smc6-56 exo1Δ pif1Δ</i>          | W303, <i>smc6-56<sup>13myc</sup>::KanMX, exo1Δ::hphNT1, pif1Δ::natNT2</i>                                    | This study   |
| <i>smc6-56 ubc13Δ</i>               | W303, <i>smc6-56<sup>13myc</sup>::KanMX, ubc13Δ::natNT2</i>                                                  | This study   |
| <i>smc6-56 ubc13Δ exo1Δ</i>         | W303, <i>smc6-56<sup>13myc</sup>::KanMX, ubc13Δ::HIS3MX, exo1Δ::hphNT1</i>                                   | This study   |
| <i>smc6-56 ubc13Δ pif1Δ</i>         | W303, <i>smc6-56<sup>13myc</sup>::KanMX, ubc13Δ::HIS3MX, pif1Δ::natNT2</i>                                   | This study   |

|                                        |                                                                                           |            |
|----------------------------------------|-------------------------------------------------------------------------------------------|------------|
| <i>smc6-56 ubc13Δ exo1Δ pif1Δ</i>      | W303, <i>smc6-56<sup>13myc</sup>::KanMX, ubc13Δ::HIS3MX, exo1Δ::hphNT1, pif1Δ::natNT2</i> | This study |
| <i>smc6-56 pif1-m1</i>                 | W303, <i>smc6-56<sup>13myc</sup>::KanMX, pif1-m1::TRP1</i>                                | This study |
| <i>smc6-56 pif1-m2</i>                 | W303, <i>smc6-56<sup>13myc</sup>::KanMX, pif1-m2::TRP1</i>                                | This study |
| <i>smc6-56 pif1-R3E</i>                | W303, <i>smc6-56<sup>13myc</sup>::KanMX, pif1-R3E::TRP1</i>                               | This study |
| <i>smc6-56 pif1-R3E<sup>9myc</sup></i> | W303, <i>smc6-56<sup>13myc</sup>::KanMX, pif1-R3E<sup>9myc</sup>::hphNT1</i>              | This study |
| <i>BrdU Inc x7</i>                     | W303, <i>GAL, psi+, URA::GPD-TK×7, phENT1-LEU2</i>                                        | (7)        |
| <i>BrdU Inc x7 exo1Δ</i>               | W303, <i>GAL, psi+, URA::GPD-TK×7, phENT1-LEU2 exo1Δ::hphNT1</i>                          | (4)        |
| <i>BrdU Inc x7 pif1Δ</i>               | W303, <i>GAL, psi+, URA::GPD-TK×7, phENT1-LEU2 pif1Δ::natNT2</i>                          | This study |
| <i>BrdU Inc x7 exo1Δ pif1Δ</i>         | W303, <i>GAL, psi+, URA::GPD-TK×7, phENT1-LEU2 exo1Δ::hphNT1, pif1Δ::natNT2</i>           | This study |

## SUPPLEMENTARY REFERENCES

1. Finley,D., Ozkaynak,E. and Varshavsky,A. (1987) The yeast polyubiquitin gene is essential for resistance to high temperatures, starvation, and other stresses. *Cell*, **48**, 1035-1046.
2. Ulrich,H.D. and Jentsch,S. (2000) Two RING finger proteins mediate cooperation between ubiquitin-conjugating enzymes in DNA repair. *EMBO J.*, **19**, 3388-3397.
3. Saugar,I., Parker,J.L., Zhao,S. and Ulrich,H.D. (2012) The genome maintenance factor Mgs1 is targeted to sites of replication stress by ubiquitylated PCNA. *Nucleic Acids Res.*, **40**, 245-257.
4. Garcia-Rodriguez,N., Morawska,M., Wong,R.P., Daigaku,Y. and Ulrich,H.D. (2018) Spatial separation between replisome- and template-induced replication stress signaling. *EMBO J.*, **37**, e98369.
5. Stelter,P. and Ulrich,H.D. (2003) Control of spontaneous and damage-induced mutagenesis by SUMO and ubiquitin conjugation. *Nature*, **425**, 188-191.
6. Choi,K., Szakal,B., Chen,Y.H., Branzei,D. and Zhao,X. (2010) The Smc5/6 complex and Esc2 influence multiple replication-associated recombination processes in *Saccharomyces cerevisiae*. *Mol. Biol. Cell*, **21**, 2306-2314.
7. Bianco,J.N., Poli,J., Saksouk,J., Bacal,J., Silva,M.J., Yoshida,K., Lin,Y.L., Tourriere,H., Lengronne,A. and Pasero,P. (2012) Analysis of DNA replication profiles in budding yeast and mammalian cells using DNA combing. *Methods*, **57**, 149-157.

## SUPPLEMENTARY FIGURE LEGENDS

**Figure S1. Nuclear, but not mitochondrial Pif1 participates in TS, and both Exo1 and Pif1 function in the same pathway as Ubc13.** **A.** Disruption of the nuclear form of Pif1 (*pif1-m2*) but not the mitochondrial form (*pif1-m1*) suppresses the MMS sensitivity of *smc6-56*. Serial dilutions of relevant strains were spotted onto plates containing the indicated concentrations of MMS. **B.** Exo1 and Pif1 are epistatic to Ubc13 with respect to the suppression of the MMS sensitivity of *smc6-56*. Serial dilutions of relevant strains were spotted onto plates containing the indicated concentrations of MMS. **C.** The double mutant *exo1Δ pif1-m2* rescues the cold sensitivity of *pol32Δ* more efficiently than either single mutant. Serial dilutions of relevant strains were spotted onto YPD plates and incubated at the indicated temperatures.

**Figure S2: Deletion of *PIF1* reduces the amount of X-shaped molecules in early S phase.** 2D gel analysis of a 6 kbp region upstream the ARS305 was performed with the indicated strains, treated as in Figure 2D. The 3.4 kbp HindIII-HindIII fragment analysed by 2D gel electrophoresis is shown on the left. Quantification of X-shaped molecules, relative to *sgs1Δ* and normalized to the n-spot is shown at the bottom.

**Figure S3: Deletion of Pif1 reduces the overall length of replication tracts in the presence of DNA damage.** Quantification of replication tract length on DNA fibres from Figure 4. Number of EdU tracts analysed: *WT* = 177; *exo1Δ* = 120; *pif1Δ* = 81; *exo1Δ pif1Δ* = 150. Significance was calculated by the Mann-Whitney test (ns: not significant; \*\*\*\*\*:  $p < 0.0001$ ). Black bar = mean.

**Figure S4: Mutant *pif1-R3E* is expressed at near wild-type levels and only compromises the nuclear function of the protein.** **A.** Western blots of total cell extracts, showing protein levels of Pif1<sup>9myc</sup> and *pif1-R3E*<sup>9myc</sup> (two independent clones each) in *WT* and *smc6-56* background. Pgk1 served as loading control. **B.** The *pif1-R3E* mutation does not increase

tolerance to zinc. Serial dilutions of relevant strains were spotted onto plates containing the indicated concentrations of ZnCl<sub>2</sub>.

**Figure S5: Pif1 co-localizes with Rad52 upon MMS treatment.** Representative images of *WT* cells synchronized in G1 with  $\alpha$ -factor and released in media containing 0.033% MMS for 90 min. A magnified section of the images are shown at the bottom. Scale bar = 5  $\mu$ m.

**Figure S6: Deletion of *RRM3* aggravates the cold sensitivity of *pol32 $\Delta$* .** Serial dilutions of relevant strains were spotted onto YPD plates and incubated at the indicated temperatures.

Figure S1 (García-Rodríguez et al.)

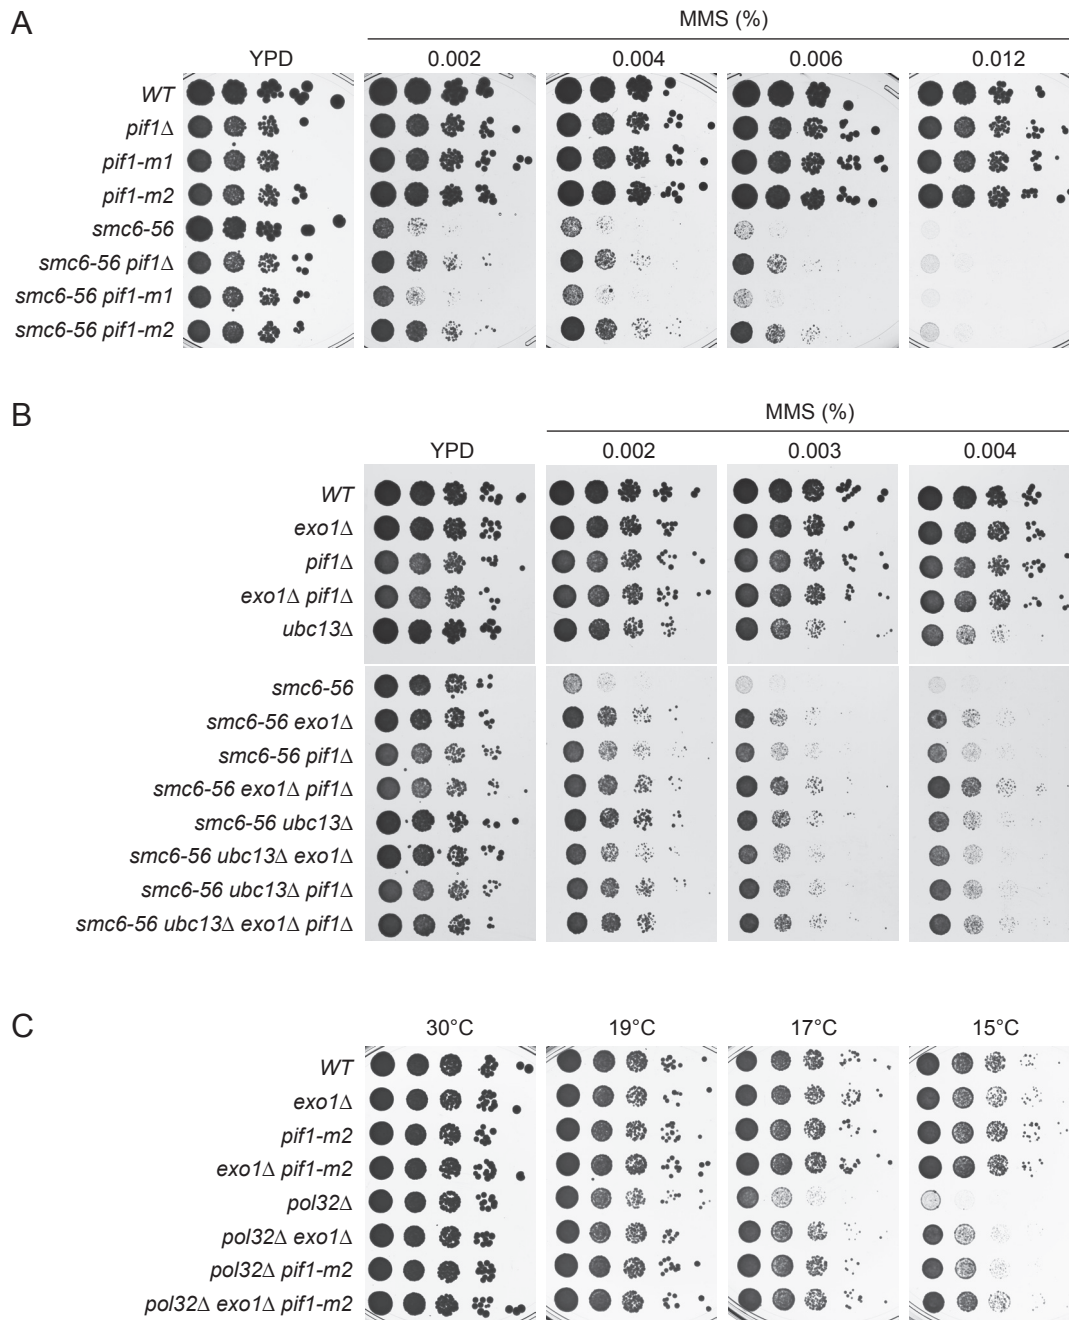

**Figure S2** (García-Rodríguez et al.)

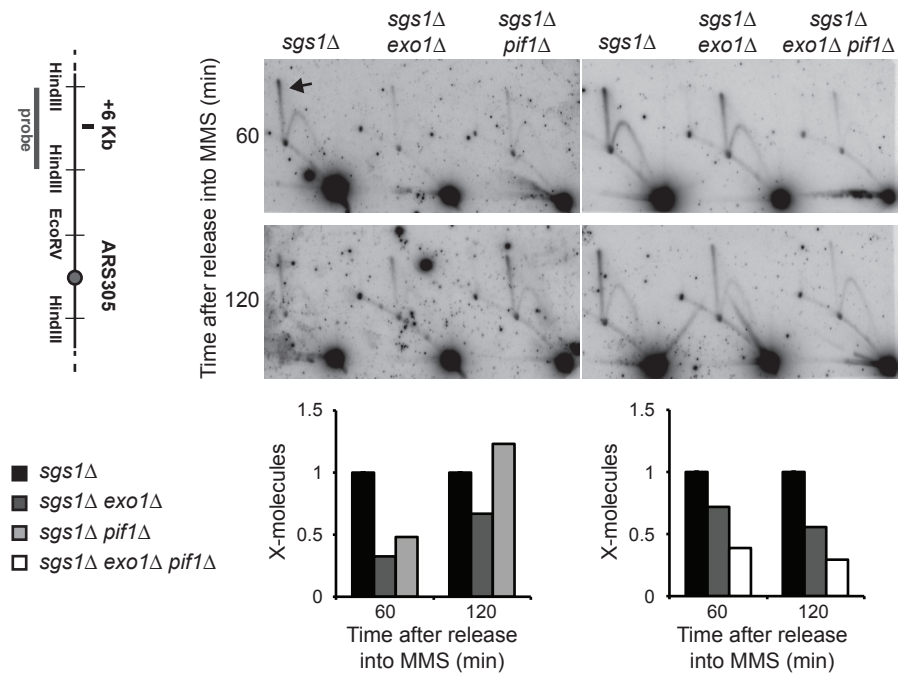



**Figure S3** (García-Rodríguez et al.)

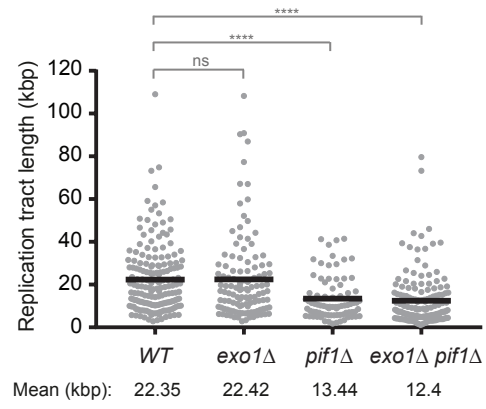

Figure S4 (García-Rodríguez et al.)

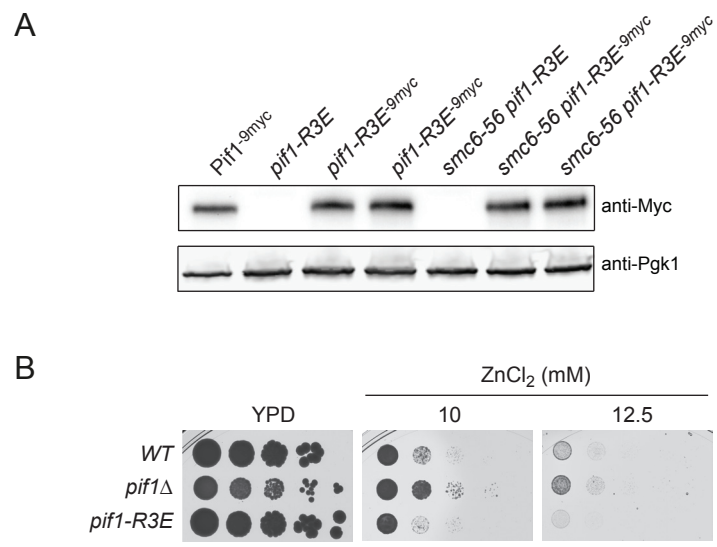

Figure S5 (García-Rodríguez et al.)

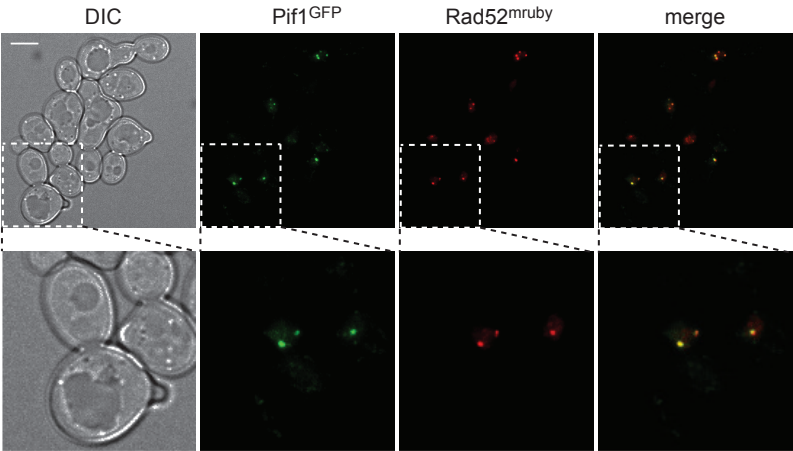

Figure S6 (García-Rodríguez et al.)

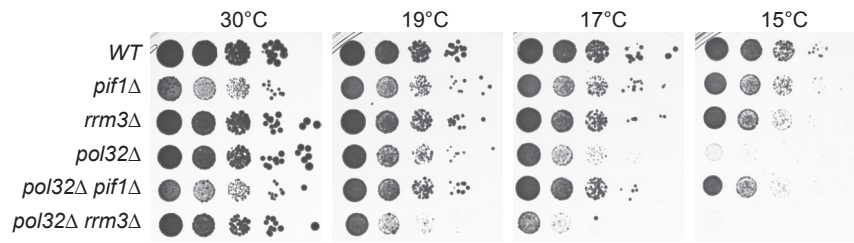

Supplement: gky648_supplemental_files.pdf [file gky648_supplemental_files.pdf]
